# Supplementary material
Source: publisher site journal article supplement (https://www.spandidos-publications.com/4522/downloadSupplementary)
Supplement: Supplementary file 1 [file downloadSupplementary]

## Sheet: Raw dataset
Table SI. Raw dataset.
No	Author	Year	Country	Institution	recruitment year	Cancer type	Ethinicity	Type	code	SNP	genotyping method	Group	Sample size	Age	Male	Smoking	Alcohol consumption	P_con	N_con	Group	Sample size	Age	Male	Smoking	Alcohol consumption	P_case	N_case
1	Ren, M. M.	2020	China	Binzhou Medical University		lung	Asian		characteristics		MassArray system	control	196	64.82 ± 10.00	139 (70.9)	190	188			Case	196	64.32 ± 10.26	136 (69.4)	195	196
1	Ren, M. M.	2020	China	Binzhou Medical University		lung	Asian	ALL	rs920778	AA		control	183					104	79	Case	184					114	70
1	Ren, M. M.	2020	China	Binzhou Medical University		lung	Asian	ALL	rs920778	AG		control	183					69	114	Case	184					60	124
1	Ren, M. M.	2020	China	Binzhou Medical University		lung	Asian	ALL	rs920778	GG		control	183					10	173	Case	184					10	174
1	Ren, M. M.	2020	China	Binzhou Medical University		lung	Asian	ALL	rs920778	AG+GG		control	183					79	104	Case	184					70	114
1	Ren, M. M.	2020	China	Binzhou Medical University		lung	Asian	Female	rs920778	AA		control	53					30	23	Case	58					40	18
1	Ren, M. M.	2020	China	Binzhou Medical University		lung	Asian	Female	rs920778	AG		control	53					21	32	Case	58					16	42
1	Ren, M. M.	2020	China	Binzhou Medical University		lung	Asian	Female	rs920778	GG		control	53					2	51	Case	58					2	56
1	Ren, M. M.	2020	China	Binzhou Medical University		lung	Asian	Female	rs920778	AG+GG		control	53					23	30	Case	58					18	40
1	Ren, M. M.	2020	China	Binzhou Medical University		lung	Asian	Male	rs920778	AA		control	130					74	56	Case	126					74	52
1	Ren, M. M.	2020	China	Binzhou Medical University		lung	Asian	Male	rs920778	AG		control	130					48	82	Case	126					44	82
1	Ren, M. M.	2020	China	Binzhou Medical University		lung	Asian	Male	rs920778	GG		control	130					8	122	Case	126					8	118
1	Ren, M. M.	2020	China	Binzhou Medical University		lung	Asian	Male	rs920778	AG+GG		control	130					56	74	Case	126					52	74
1	Ren, M. M.	2020	China	Binzhou Medical University		lung	Asian	Smoking	rs920778	AA		control	55					29	26	Case	92					53	39
1	Ren, M. M.	2020	China	Binzhou Medical University		lung	Asian	Smoking	rs920778	AG		control	55					24	31	Case	92					33	59
1	Ren, M. M.	2020	China	Binzhou Medical University		lung	Asian	Smoking	rs920778	GG		control	55					2	53	Case	92					6	86
1	Ren, M. M.	2020	China	Binzhou Medical University		lung	Asian	Smoking	rs920778	AG+GG		control	55					26	29	Case	92					39	53
1	Ren, M. M.	2020	China	Binzhou Medical University		lung	Asian	Nosmoking	rs920778	AA		control	128					75	53	Case	92					61	31
1	Ren, M. M.	2020	China	Binzhou Medical University		lung	Asian	Nosmoking	rs920778	AG		control	128					45	83	Case	92					27	65
1	Ren, M. M.	2020	China	Binzhou Medical University		lung	Asian	Nosmoking	rs920778	GG		control	128					8	120	Case	92					4	88
1	Ren, M. M.	2020	China	Binzhou Medical University		lung	Asian	Nosmoking	rs920778	AG+GG		control	128					53	75	Case	92					31	61
1	Ren, M. M.	2020	China	Binzhou Medical University		lung	Asian	Drinking	rs920778	AA		control	50					31	19	Case	61					38	23
1	Ren, M. M.	2020	China	Binzhou Medical University		lung	Asian	Drinking	rs920778	AG		control	50					18	32	Case	61					19	42
1	Ren, M. M.	2020	China	Binzhou Medical University		lung	Asian	Drinking	rs920778	GG		control	50					1	49	Case	61					4	57
1	Ren, M. M.	2020	China	Binzhou Medical University		lung	Asian	Drinking	rs920778	AG+GG		control	50					19	31	Case	61					23	38
1	Ren, M. M.	2020	China	Binzhou Medical University		lung	Asian	Nodrinking	rs920778	AA		control	133					73	60	Case	123					76	47
1	Ren, M. M.	2020	China	Binzhou Medical University		lung	Asian	Nodrinking	rs920778	AG		control	133					51	82	Case	123					41	82
1	Ren, M. M.	2020	China	Binzhou Medical University		lung	Asian	Nodrinking	rs920778	GG		control	133					9	124	Case	123					6	117
1	Ren, M. M.	2020	China	Binzhou Medical University		lung	Asian	Nodrinking	rs920778	AG+GG		control	133					60	73	Case	123					47	76
1	Ren, M. M.	2020	China	Binzhou Medical University		lung	Asian	All	rs1899663	AA		control	188					5	183	Case	187					4	183
1	Ren, M. M.	2020	China	Binzhou Medical University		lung	Asian	All	rs1899663	AC		control	188					60	128	Case	187					52	135
1	Ren, M. M.	2020	China	Binzhou Medical University		lung	Asian	All	rs1899663	CC		control	188					123	65	Case	187					131	56
1	Ren, M. M.	2020	China	Binzhou Medical University		lung	Asian	All	rs1899663	AC+CC		control	188					183	5	Case	187					183	4
1	Ren, M. M.	2020	China	Binzhou Medical University		lung	Asian	Male	rs1899663	AA		control	144					3	141	Case	128					4	124
1	Ren, M. M.	2020	China	Binzhou Medical University		lung	Asian	Male	rs1899663	AC		control	144					42	102	Case	128					37	91
1	Ren, M. M.	2020	China	Binzhou Medical University		lung	Asian	Male	rs1899663	CC		control	144					89	55	Case	128					87	41
1	Ren, M. M.	2020	China	Binzhou Medical University		lung	Asian	Male	rs1899663	AC+CC		control	144					131	13	Case	128					124	4
1	Ren, M. M.	2020	China	Binzhou Medical University		lung	Asian	Drinking	rs1899663	AA		control	53					1	52	Case	60					1	59
1	Ren, M. M.	2020	China	Binzhou Medical University		lung	Asian	Drinking	rs1899663	AC		control	53					14	39	Case	60					14	46
1	Ren, M. M.	2020	China	Binzhou Medical University		lung	Asian	Drinking	rs1899663	CC		control	53					38	15	Case	60					45	15
1	Ren, M. M.	2020	China	Binzhou Medical University		lung	Asian	Drinking	rs1899663	AC+CC		control	53					52	1	Case	60					59	1
1	Ren, M. M.	2020	China	Binzhou Medical University		lung	Asian	Nodrinking	rs1899663	AA		control	131					4	127	Case	126					3	123
1	Ren, M. M.	2020	China	Binzhou Medical University		lung	Asian	Nodrinking	rs1899663	AC		control	131					46	85	Case	126					38	88
1	Ren, M. M.	2020	China	Binzhou Medical University		lung	Asian	Nodrinking	rs1899663	CC		control	131					85	46	Case	126					86	40
1	Ren, M. M.	2020	China	Binzhou Medical University		lung	Asian	Nodrinking	rs1899663	AC+CC		control	131					127	4	Case	126					123	3
1	Ren, M. M.	2020	China	Binzhou Medical University		lung	Asian	All	rs4759314	AA		control	184					168	16	Case	175					158	17
1	Ren, M. M.	2020	China	Binzhou Medical University		lung	Asian	All	rs4759314	AG		control	184					16	168	Case	175					17	158
1	Ren, M. M.	2020	China	Binzhou Medical University		lung	Asian	All	rs4759314	GG		control	184					0		Case	175					0
1	Ren, M. M.	2020	China	Binzhou Medical University		lung	Asian	Female	rs4759314	AA		control	53					49	4	Case	56					50	6
1	Ren, M. M.	2020	China	Binzhou Medical University		lung	Asian	Female	rs4759314	AG		control	53					4	49	Case	56					6	50
1	Ren, M. M.	2020	China	Binzhou Medical University		lung	Asian	Male	rs4759314	AA		control	131					119	12	Case	119					108	11
1	Ren, M. M.	2020	China	Binzhou Medical University		lung	Asian	Male	rs4759314	AG		control	131					12	119	Case	119					11	108
1	Ren, M. M.	2020	China	Binzhou Medical University		lung	Asian	Smoking	rs4759314	AA		control	54					48	6	Case	91					82	9
1	Ren, M. M.	2020	China	Binzhou Medical University		lung	Asian	Smoking	rs4759314	AG		control	54					6	48	Case	91					9	82
1	Ren, M. M.	2020	China	Binzhou Medical University		lung	Asian	Nosmoking	rs4759314	AA		control	130					120	10	Case	84					76	8
1	Ren, M. M.	2020	China	Binzhou Medical University		lung	Asian	Nosmoking	rs4759314	AG		control	130					10	120	Case	84					8	76
1	Ren, M. M.	2020	China	Binzhou Medical University		lung	Asian	Drinking	rs4759314	AA		control	51					48	3	Case	55					48	7
1	Ren, M. M.	2020	China	Binzhou Medical University		lung	Asian	Drinking	rs4759314	AG		control	51					3	48	Case	55					7	48
1	Ren, M. M.	2020	China	Binzhou Medical University		lung	Asian	Nodrinking	rs4759314	AA		control	133					120	13	Case	120					110	10
1	Ren, M. M.	2020	China	Binzhou Medical University		lung	Asian	Nodrinking	rs4759314	AG		control	133					13	120	Case	120					10	110
2	Minn, A. K. K.	2020	Japan	Tokyo Medical and Dental University		Recessive	Asian	All	rs920778	AA+AG	TaqMan Assay-PCR	control	1241					1171	70	Case	129					128	1
2	Minn, A. K. K.	2020	Japan	Tokyo Medical and Dental University		Recessive	Asian	All	rs920778	GG		control	1241					70	1171	Case	129					1	128
2	Minn, A. K. K.	2020	Japan	Tokyo Medical and Dental University		Dominant	Asian	All	rs920778	AA		control	1241					698	543	Case	129					75	54
2	Minn, A. K. K.	2020	Japan	Tokyo Medical and Dental University		Dominant	Asian	All	rs920778	AG+GG		control	1241					543	698	Case	129					54	75
2	Minn, A. K. K.	2020	Japan	Tokyo Medical and Dental University		Codominant	Asian	All	rs920778	AA		control	1241					698	543	Case	129					75	54
2	Minn, A. K. K.	2020	Japan	Tokyo Medical and Dental University		Codominant	Asian	All	rs920778	AG		control	1241					473	768	Case	129					53	76
2	Minn, A. K. K.	2020	Japan	Tokyo Medical and Dental University		Codominant	Asian	All	rs920778	GG		control	1241					70	1171	Case	129					1	128
2	Minn, A. K. K.	2020	Japan	Tokyo Medical and Dental University		Allelic	Asian	All	rs920778	A		control						1869		Case						203
2	Minn, A. K. K.	2020	Japan	Tokyo Medical and Dental University		Allelic	Asian	All	rs920778	G		control						613		Case						55
3	Wang, C.	2018	China	Tianjin Medical University General Hospital			Asian		characteristics		TaqMan Assay-PCR	control	451		280	159				Case	262		188	169
3	Wang, C.	2018	China	Tianjin Medical University General Hospital			Asian	All	rs920778	AA		control	451					233	218	Case	262					110	152
3	Wang, C.	2018	China	Tianjin Medical University General Hospital			Asian	All	rs920778	AG		control	451					192	259	Case	262					132	130
3	Wang, C.	2018	China	Tianjin Medical University General Hospital			Asian	All	rs920778	GG		control	451					26	425	Case	262					20	242
3	Wang, C.	2018	China	Tianjin Medical University General Hospital			Asian	All	rs920778	AG+GG		control	451					218	233	Case	262					152	110
3	Wang, C.	2018	China	Tianjin Medical University General Hospital			Asian	All	rs12826786	CC		control	451					355	96	Case	262					200	62
3	Wang, C.	2018	China	Tianjin Medical University General Hospital			Asian	All	rs12826786	CT		control	451					85	366	Case	262					49	213
3	Wang, C.	2018	China	Tianjin Medical University General Hospital			Asian	All	rs12826786	TT		control	451					11	440	Case	262					13	249
3	Wang, C.	2018	China	Tianjin Medical University General Hospital			Asian	All	rs12826786	TT+CT		control	451					96	355	Case	262					62	200
3	Wang, C.	2018	China	Tianjin Medical University General Hospital			Asian	All	rs4359714	AA		control	451					412	39	Case	262					238	24
3	Wang, C.	2018	China	Tianjin Medical University General Hospital			Asian	All	rs4359714	AG		control	451					37	414	Case	262					21	241
3	Wang, C.	2018	China	Tianjin Medical University General Hospital			Asian	All	rs4359714	GG		control	451					2	449	Case	262					3	259
3	Wang, C.	2018	China	Tianjin Medical University General Hospital			Asian	All	rs4359714	AG+GG		control	451					39	412	Case	262					24	238
3	Wang, C.	2018	China	Tianjin Medical University General Hospital			Asian	All	rs1899663	CC		control	451					254	197	Case	262					178	84
3	Wang, C.	2018	China	Tianjin Medical University General Hospital			Asian	All	rs1899663	AC		control	451					189	262	Case	262					66	196
3	Wang, C.	2018	China	Tianjin Medical University General Hospital			Asian	All	rs1899663	AA		control	451					8	443	Case	262					18	244
3	Wang, C.	2018	China	Tianjin Medical University General Hospital			Asian	All	rs1899663	AA+AC		control	451					197	254	Case	262					84	178
4	Li, Hang	2018	China	China Medical University			Asian	All	characteristics		TaqMan Assay-PCR	control	551	56.69±15.65	165	111				Case	543	57.99±11.51	192	165
4	Li, Hang	2018	China	China Medical University			Asian	All	rs920778	AA		control	551					326	225	Case	543					324	219
4	Li, Hang	2018	China	China Medical University			Asian	All	rs920778	AG		control	551					203	348	Case	543					197	346
4	Li, Hang	2018	China	China Medical University			Asian	All	rs920778	GG		control	551					22	529	Case	543					22	521
4	Li, Hang	2018	China	China Medical University			Asian	Male	rs920778	AG+GG		control	165					65	100	Case	192					80	112
4	Li, Hang	2018	China	China Medical University			Asian	Male	rs920778	AA		control	165					100	65	Case	192					112	80
4	Li, Hang	2018	China	China Medical University			Asian	Female	rs920778	AG+GG		control	378					154	224	Case	359					145	214
4	Li, Hang	2018	China	China Medical University			Asian	Female	rs920778	AA		control	378					224	154	Case	359					214	145
4	Li, Hang	2018	China	China Medical University			Asian	Smoking	rs920778	AG+GG		control	111					51	60	Case	165					70	95
4	Li, Hang	2018	China	China Medical University			Asian	Smoking	rs920778	AA		control	111					60	51	Case	165					95	70
4	Li, Hang	2018	China	China Medical University			Asian	Nosmoking	rs920778	AG+GG		control	432					168	264	Case	386					155	231
4	Li, Hang	2018	China	China Medical University			Asian	Nosmoking	rs920778	AA		control	432					264	168	Case	386					231	155
4	Li, Hang	2018	China	China Medical University			Asian	Adenocarcinoma	rs920778	AG+GG		control	543					219	324	Case	305					125	180
4	Li, Hang	2018	China	China Medical University			Asian	Adenocarcinoma	rs920778	AA		control	543					324	219	Case	305					180	125
4	Li, Hang	2018	China	China Medical University			Asian	Squamous lung cancer	rs920778	AG+GG		control	543					219	324	Case	131					55	76
4	Li, Hang	2018	China	China Medical University			Asian	Squamous lung cancer	rs920778	AA		control	543					324	219	Case	131					76	55
4	Li, Hang	2018	China	China Medical University			Asian	small cell lung cancer	rs920778	AG+GG		control	543					219	324	Case	112					46	66
4	Li, Hang	2018	China	China Medical University			Asian	small cell lung cancer	rs920778	AA		control	543					324	219	Case	112					66	46
4	Li, Hang	2018	China	China Medical University			Asian	All	rs12826786	CC		control	551					381	170	Case	543					340	203
4	Li, Hang	2018	China	China Medical University			Asian	All	rs12826786	CT		control	551					156	395	Case	543					185	358
4	Li, Hang	2018	China	China Medical University			Asian	All	rs12826786	TT		control	551					14	537	Case	543					18	525
4	Li, Hang	2018	China	China Medical University			Asian	Male	rs12826786	TT+CT		control	165					61	104	Case	192					58	134
4	Li, Hang	2018	China	China Medical University			Asian	Male	rs12826786	CC		control	165					104	61	Case	192					134	58
4	Li, Hang	2018	China	China Medical University			Asian	Female	rs12826786	TT+TC		control	378					142	236	Case	359					112	247
4	Li, Hang	2018	China	China Medical University			Asian	Female	rs12826786	CC		control	378					236	142	Case	359					247	112
4	Li, Hang	2018	China	China Medical University			Asian	Smoking	rs12826786	TT+TC		control	111					48	63	Case	377					112	265
4	Li, Hang	2018	China	China Medical University			Asian	Smoking	rs12826786	CC		control	111					63	48	Case	377					265	112
4	Li, Hang	2018	China	China Medical University			Asian	Nosmoking	rs12826786	TT+TC		control	432					155	277	Case	165					49	116
4	Li, Hang	2018	China	China Medical University			Asian	Nosmoking	rs12826786	CC		control	432					277	155	Case	165					116	49
4	Li, Hang	2018	China	China Medical University			Asian	Adenocarcinoma	rs12826786	TT+TC		control	543					203	340	Case	304					97	207
4	Li, Hang	2018	China	China Medical University			Asian	Adenocarcinoma	rs12826786	CC		control	543					340	203	Case	304					207	97
4	Li, Hang	2018	China	China Medical University			Asian	Squamous lung cancer	rs12826786	TT+TC		control	543					203	340	Case	131					40	91
4	Li, Hang	2018	China	China Medical University			Asian	Squamous lung cancer	rs12826786	CC		control	543					340	203	Case	131					91	40
4	Li, Hang	2018	China	China Medical University			Asian	small cell lung cancer	rs12826786	TT+TC		control	543					203	340	Case	131					40	91
4	Li, Hang	2018	China	China Medical University			Asian	small cell lung cancer	rs12826786	CC		control	543					340	203	Case	131					91	40
4	Li, Hang	2018	China	China Medical University			Asian	All	rs4759314	AA		control	551					489	62	Case	543					526	17
4	Li, Hang	2018	China	China Medical University			Asian	All	rs4759314	AG		control	551					61	490	Case	543					16	527
4	Li, Hang	2018	China	China Medical University			Asian	All	rs4759314	GG		control	551					1	550	Case	543					1	542
4	Li, Hang	2018	China	China Medical University			Asian	Male	rs4759314	GG+AG		control	165					5	160	Case	192					26	166
4	Li, Hang	2018	China	China Medical University			Asian	Male	rs4759314	AA		control	165					160	5	Case	192					166	26
4	Li, Hang	2018	China	China Medical University			Asian	Female	rs4759314	GG+AG		control	378					12	366	Case	359					36	323
4	Li, Hang	2018	China	China Medical University			Asian	Female	rs4759314	AA		control	378					366	12	Case	359					323	36
4	Li, Hang	2018	China	China Medical University			Asian	Smoking	rs4759314	GG+AG		control	111					4	107	Case	165					23	142
4	Li, Hang	2018	China	China Medical University			Asian	Smoking	rs4759314	AA		control	111					107	4	Case	165					142	23
4	Li, Hang	2018	China	China Medical University			Asian	Nosmoking	rs4759314	GG+AG		control	432					13	419	Case	386					39	347
4	Li, Hang	2018	China	China Medical University			Asian	Nosmoking	rs4759314	AA		control	432					419	13	Case	386					347	39
4	Li, Hang	2018	China	China Medical University			Asian	Adenocarcinoma	rs4759314	GG+AG		control	543					17	526	Case	304					31	273
4	Li, Hang	2018	China	China Medical University			Asian	Adenocarcinoma	rs4759314	AA		control	543					526	17	Case	304					273	31
4	Li, Hang	2018	China	China Medical University			Asian	Squamous lung cancer	rs4759314	GG+AG		control	543					17	526	Case	131					17	114
4	Li, Hang	2018	China	China Medical University			Asian	Squamous lung cancer	rs4759314	AA		control	543					526	17	Case	131					114	17
4	Li, Hang	2018	China	China Medical University			Asian	small cell lung cancer	rs4759314	GG+AG		control	543					17	526	Case	109					13	96
4	Li, Hang	2018	China	China Medical University			Asian	small cell lung cancer	rs4759314	AA		control	543					526	17	Case	109					96	13
5	Dadas, Erdogan	2018	Turkey	Adiyaman University		NSCLC	NG		characteristics		TaqMan Assay-PCR	control	93	61.77 ± 12.00	67	61				Case	87	59.27 ± 10.55	71	26
5	Dadas, Erdogan	2018	Turkey	Adiyaman University				All	rs12826786	CC		control	93					38	55	Case	87					33	54
5	Dadas, Erdogan	2018	Turkey	Adiyaman University			NG	All	rs12826786	CT		control	93					41	52	Case	87					41	46
5	Dadas, Erdogan	2018	Turkey	Adiyaman University			NG	All	rs12826786	TT		control	93					14	79	Case	87					13	74
5	Dadas, Erdogan	2018	Turkey	Adiyaman University			NG	All	rs1899663	CC		control	93					41	52	Case	87					39	48
5	Dadas, Erdogan	2018	Turkey	Adiyaman University			NG	All	rs1899663	CA		control	93					40	53	Case	87					37	50
5	Dadas, Erdogan	2018	Turkey	Adiyaman University			NG	All	rs1899663	AA		control	93					12	81	Case	87					11	76
6	Gong, Wei-Jing	2016	China	Xiangya Hospital			NG	All	characteristics		MassARRAY	control	213		80					Case	498		394
6	Gong, Wei-Jing	2016	China	Xiangya Hospital		Dominant		All	rs7958904			control	213							Case	498							0.95(0.66-1.36)	1.43(0.71-2.9)	1.03(0.77-1.37)
6	Gong, Wei-Jing	2016	China	Xiangya Hospital				All	rs1899663	AA+AC		control	213							Case	498							1.00(0.70-1.45)	1.22(0.46-3.28)	1.03(0.75-1.41)
6	Gong, Wei-Jing	2016	China	Xiangya Hospital				All	rs4759314	GG+AG		control	213							Case	498							1.09(0.65-1.81)	1.13(0.69-2.14)	1.09(0.65-1.81)
